# Supplementary material
Source: HighWire-hosted journal article supplement (https://gut.bmj.com/content/67/1/108)

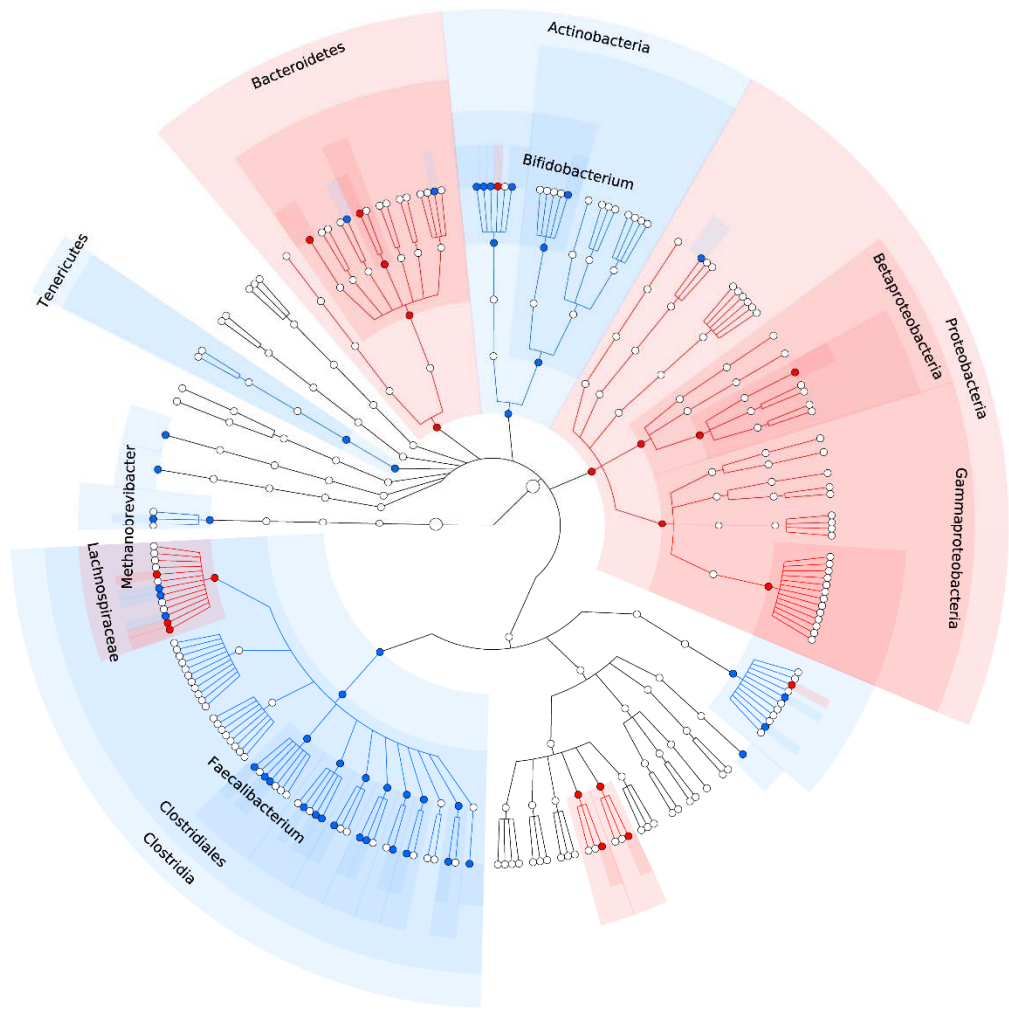

Supplement: inline-supplementary-material-10 [file inline-supplementary-material-10.pdf]

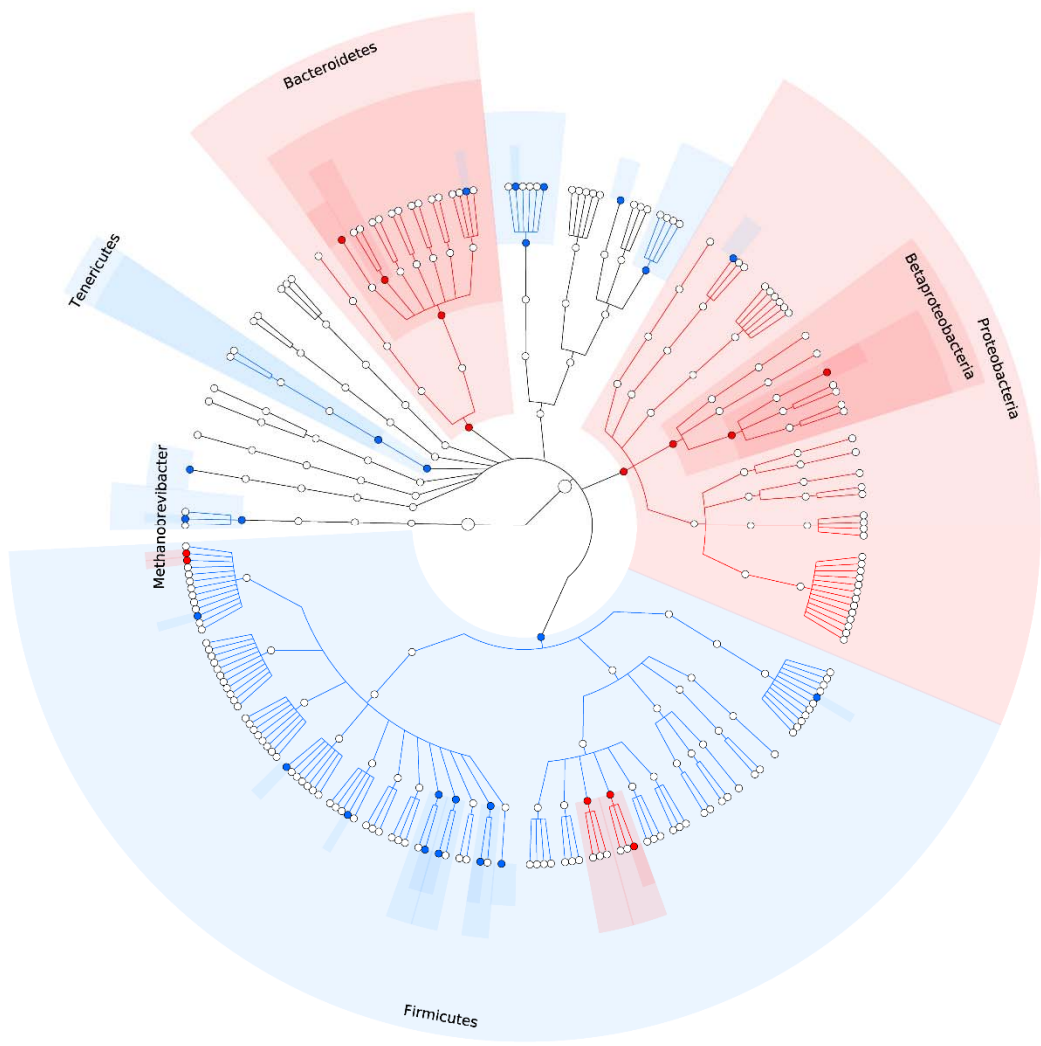

Supplement: inline-supplementary-material-11 [file inline-supplementary-material-11.pdf]

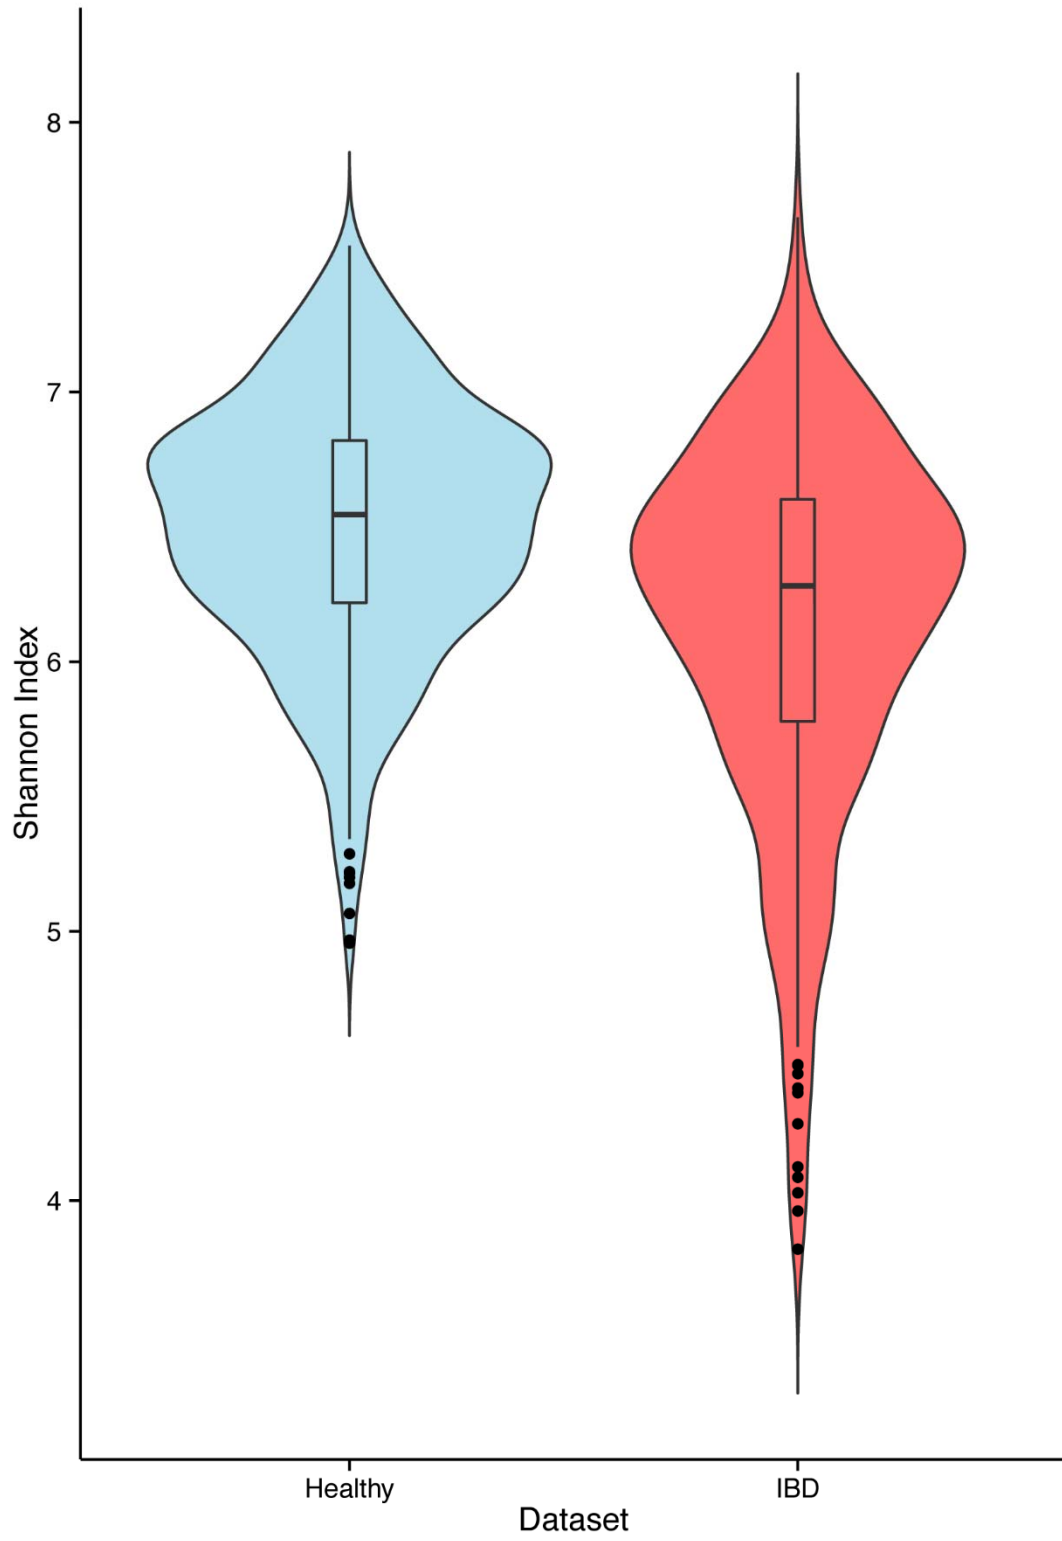

Supplement: inline-supplementary-material-3 [file inline-supplementary-material-3.pdf]

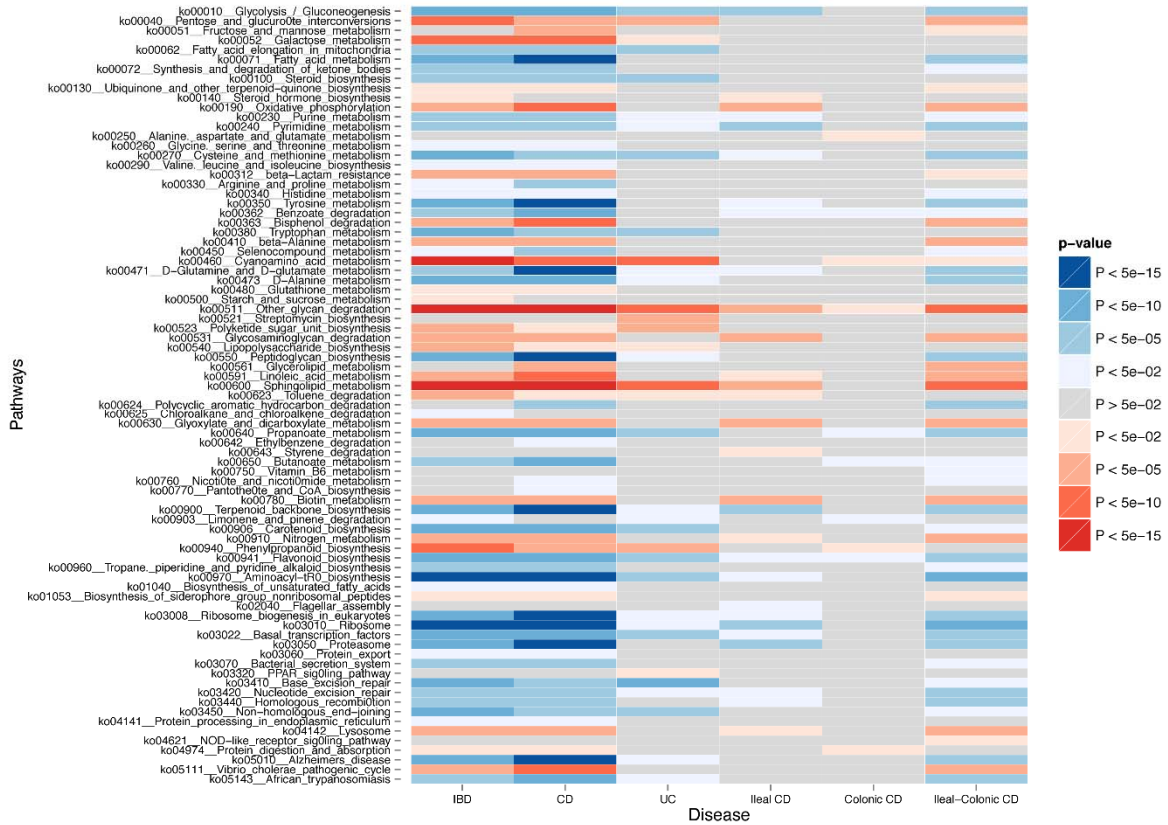

Supplement: inline-supplementary-material-5 [file inline-supplementary-material-5.pdf]
